# Supplementary material
Source: MDPI journal article supplement (https://www.mdpi.com/2076-3417/11/11/5262)
Supplement: s1 [file s1]

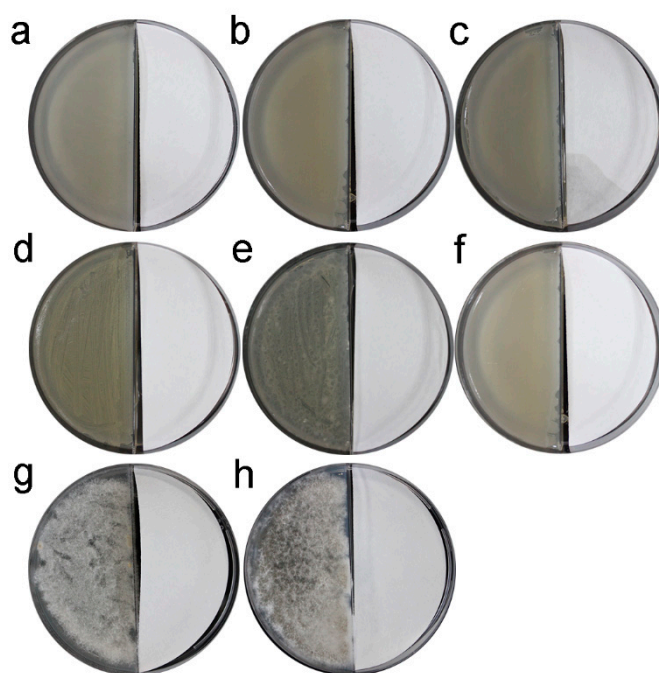

Figure S1. Microbial growth on the dichotomy plate; left (bacteria), right (0.5% Euxyl® K100). (a) *Bacillus* sp. (NK-NH15), (b) *Bacillus* sp. (NK-NH16), (c) *Bacillus* sp. (NK-NH17), (d) *B. meqaterilum* (NK-NH10), (e) *B. velezensis* (NK-NH11), (f) *B. tequilensis* (NK-NH5), (g) *F. solani* (NK-NH1), (h) *S. apiospermum* (NK.W1-3).

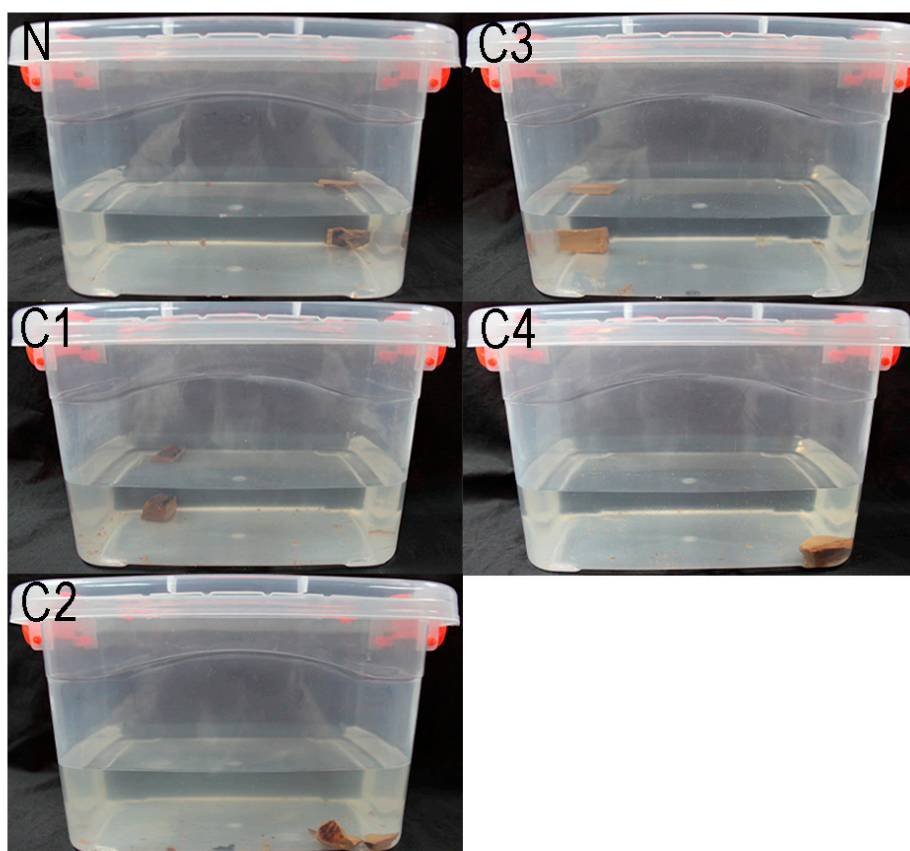

**Figure S2.** The state of shipwreck hull scattered wood in water tank. N: Water samples without cinnamaldehyde addition; C1: cinnamaldehyde concentration at 50 µg/mL; C2: cinnamaldehyde concentration at 200 µg/mL; C3: cinnamaldehyde concentration at 500 µg/mL; C4: cinnamaldehyde concentration at 1250 µg/mL. The ambient temperature of the laboratory is 18–25 °C. The annual temperature in the Marine Silk Road Museum are 16.4–30.7 °C.

**Table S1.** Molecular identification of strains isolated from the hull, sea mud

| Bacteria | Closet relative strain | Phylum     | Similarity (%) | Accession number | Source           |
|----------|------------------------|------------|----------------|------------------|------------------|
| NK-NH15  | <i>Bacillus sp.</i>    | Firmicutes | 99%            | MN524117.1       | Hull and sea mud |
| NK-NH16  | <i>Bacillus sp.</i>    | Firmicutes | 99%            | MN841964.1       | Hull and sea mud |
| NK-NH17  | <i>Bacillus sp.</i>    | Firmicutes | 100%           | MF276684.1       | Hull and sea mud |
